# Supplementary material for: Promotion of Colitis in B Cell-Deficient C57BL/6 Mice Infected with Enterotoxigenic Bacteroides fragilis
Source: MDPI journal article supplement (doi:10.3390/ijms25010364), 2023-12-27
Supplement: s1 [file s1]

[Supplementary data to *Int. J. Mol. Sci.*]

## Promotion of Colitis in B-Cell-Deficient C57BL/6 Mice Infected with Enterotoxigenic *Bacteroides fragilis*

Minjeong Jo <sup>1,2,†</sup>, Soonjae Hwang <sup>1,3,†</sup>, Chang-Gun Lee <sup>1</sup>, Ju-Eun Hong <sup>1</sup>, Da-Hye Kang <sup>1</sup>, Sang-Hyeon Yoo <sup>1</sup>, Woo-Seung Kim <sup>1</sup>, Jung-Yoon Yoo <sup>1</sup> and Ki-Jong Rhee <sup>1,\*</sup>

<sup>1</sup> Department of Biomedical Laboratory Science, College of Software and Digital Healthcare Convergence, Yonsei University Mirae Campus, Wonju 26493, Republic of Korea; jominjeong@skku.edu (M.J.); soonjae@gachon.ac.kr (S.H.); cglee@yonsei.ac.kr (C.-G.L.); jehong@yonsei.ac.kr (J.-E.H.); loolzeo@gmail.com (D.-H.K.); yshyyb@yonsei.ac.kr (S.-H.Y.); redberry1245@yonsei.ac.kr (W.-S.K.); jy\_yoo@yonsei.ac.kr (J.-Y.Y.)

<sup>2</sup> Department of Molecular Cell Biology, Sungkyunkwan University School of Medicine, Suwon 16419, Republic of Korea

<sup>3</sup> Department of Biochemistry, Lee Gil Ya Cancer and Diabetes Institute, College of Medicine, Gachon University, Incheon 21999, Republic of Korea

\* Correspondence: kjrhee@yonsei.ac.kr

† These authors contributed equally.

**Supplementary Figure S1.** ETBF colonization in colon in ETBF-infected mice.

**Supplementary Figure S2.** Flow cytometry dot plot of mesenteric lymph nodes in mice.

**Supplementary Table S1.** Histopathologic scoring of colon and ileum.

**Supplementary Table S2.** Probes for quantitative real-time PCR (TaqMan assay).

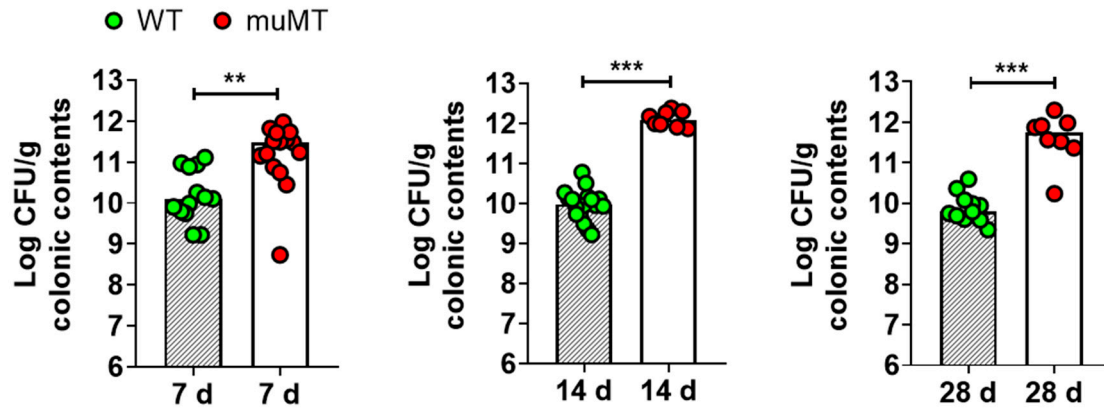

**Supplementary Figure S1.** ETBF colonization in colon of ETBF-infected mice.

Wild-type (WT) and muMT mice were infected with ETBF ( $1 \times 10^9$  CFU) for 28 days. ETBF colonization was assessed by bacterial culture of colonic contents at day 7, day 14 and day 28.  $**p < 0.01$ ,  $***p < 0.001$ , Mann-Whitney test. Each dot represents one mouse. The bar graph represents median.

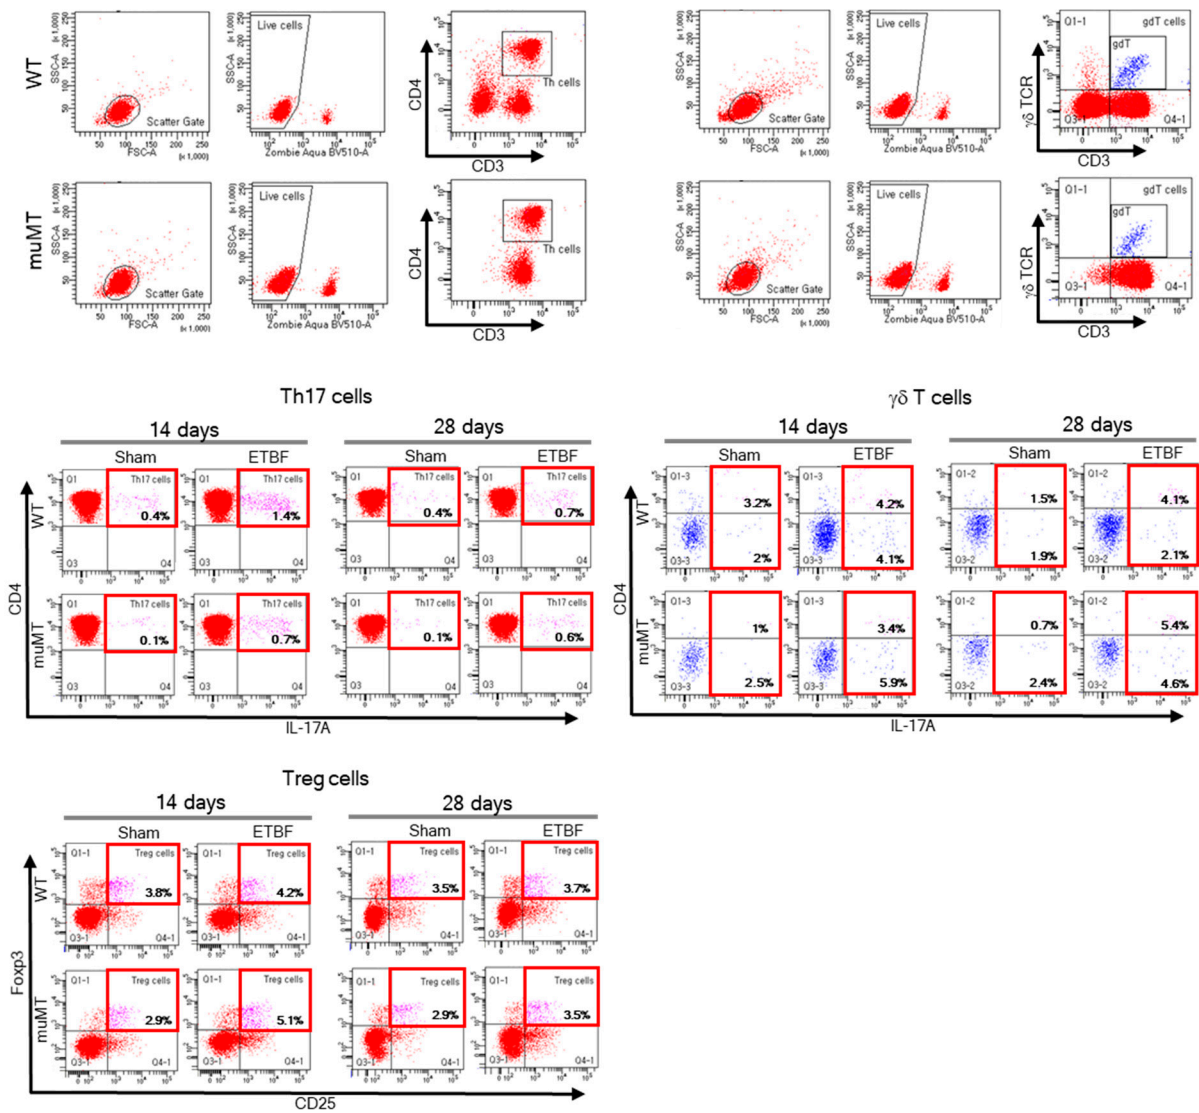

**Supplementary Figure S2.** Flow cytometric dot plot of mesenteric lymph nodes in mice.

WT and muMT mice were infected with ETBF ( $1 \times 10^9$  CFU) for day 14 or day 28. The proportion of Th17, IL-17A secreting  $\gamma\delta$ T and Treg cells in the mesenteric lymph nodes was measured by flow cytometry. Representative flow cytometry dot plots are shown.

**Supplementary Table S1. Histopathology scoring of colon and ileum**

| <b>Tissue</b>   | <b>Category</b> | <b>Description</b>                           | <b>Score</b> |
|-----------------|-----------------|----------------------------------------------|--------------|
| Colon,<br>Ileum | Normal          | Intact epithelium                            | 0            |
|                 |                 | No crypt loss                                |              |
|                 | Mild            | 85% < normal thickness of crypt length       | 1            |
|                 |                 | No infiltration of neutrophils               |              |
|                 |                 | Involvement of the lamina propria            |              |
|                 |                 | Crypt loss < 10%                             |              |
|                 | Moderate        | 70% < normal thickness of crypt length ≤ 85% | 2            |
|                 |                 | Mild infiltration of neutrophils             |              |
|                 |                 | Involvement of the submucosa                 |              |
|                 |                 | 10% ≤ crypt loss < 30%                       |              |
|                 | Severe          | 50% ≤ normal thickness of crypt length < 70% | 3            |
|                 |                 | Moderate infiltration of neutrophils         |              |
|                 |                 | Transmural ulceration                        |              |
|                 |                 | 30% < crypt loss                             |              |
|                 |                 | Normal thickness of crypt length < 50%       |              |
|                 |                 | Severe infiltration of neutrophils           |              |

**Supplementary Table S2. Probes for qRT-PCR (TaqMan assay)**

| <b>Gene symbol</b>             | <b>Assay ID</b> |
|--------------------------------|-----------------|
| <i>KC (Cxcl1)</i>              | Mm04207460_m1   |
| <i>Il-6</i>                    | Mm00446190_m1   |
| <i>Il-17A</i>                  | Mm00439618_m1   |
| <i>Il-1-<math>\beta</math></i> | Mm00434228_m1   |
| <i>Tnf-<math>\alpha</math></i> | Mm00443258_m1   |
| <i>Nos2</i>                    | Mm00440502_m1   |
| <i>GAPDH</i>                   | Mm99999915_g1   |
| <i>GPR35</i>                   | Mm01973686_s1   |
